# Supplementary material for: Estimation of refractivity uncertainties and vertical error correlations in collocated radio occultations, radiosondes, and model forecasts
Source: Copernicus journal article supplement (doi:10.5194/amt-15-6243-2022), 2022-10-28
Supplement: Supplementary file 1 [file amt-15-6243-2022-supplement.pdf]

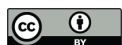

*Supplement of*

**Estimation of refractivity uncertainties and vertical error correlations in collocated radio occultations, radiosondes, and model forecasts**

**Johannes K. Nielsen et al.**

*Correspondence to:* Johannes K. Nielsen ([jkn@dmu.dk](mailto:jkn@dmu.dk))

The copyright of individual parts of the supplement might differ from the article licence.

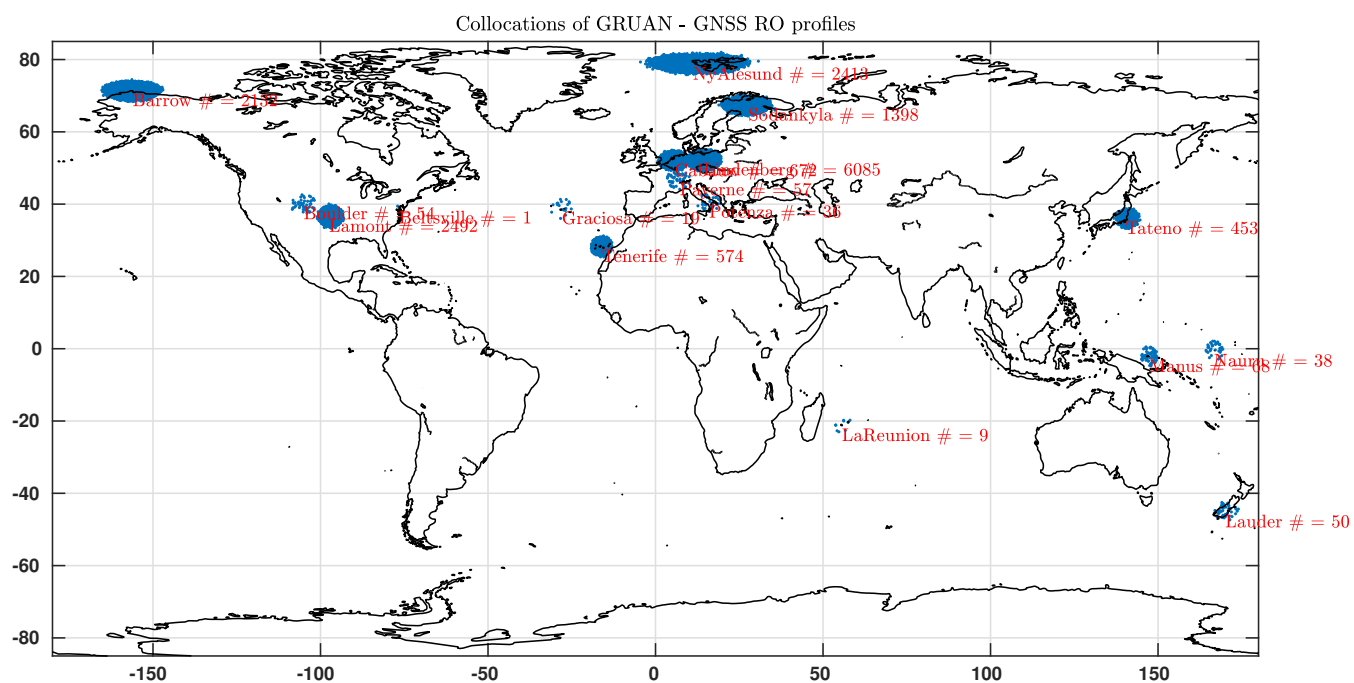

**Figure S1.** Map showing locations of the selected GRUAN RS92 sondes.
